# Supplementary material for: Stick or twist? Career decision-making during contractual uncertainty for NHS junior doctors
Source: PubMed Central journal article supplement — BMJ Open. 2017 Jan 25;7(1):e013756. doi: 10.1136/bmjopen-2016-013756 (PMC5278285; doi:10.1136/bmjopen-2016-013756), 2017-01-25
Supplement: bmjopen-2016-013756supp_appendix.pdf [file bmjopen-2016-013756supp_appendix.pdf]

## Appendix

### Survey questions which specifically referred to the proposed new contract for junior doctors

- A. Has your decision not to apply for core training (CT) or specialty training (ST) been affected by recent uncertainties and proposed changes in contracts for junior doctors?

Yes

No

Uncertain at present

Please add any comments you have to explain how the contract issues have affected your career plans.

- B. Has your decision to defer your application for core training (CT) or specialty training (ST) been affected by recent uncertainties and proposed changes in contracts for junior doctors?

Yes

No

Uncertain at present

- C. Has your decision to (possibly) work abroad been affected by recent uncertainties and proposed changes in contracts for junior doctors?

Yes

No

Uncertain at present

You may add comments in this box to explain how these contract issues have affected your career choices.

- D. Have the recent uncertainties and proposed changes in contracts for junior doctors changed your first choice of specialism?

Yes

No

Uncertain at present

Please add any comments you have on how the contract issues have affected your choice of specialism.
